# Supplementary material
Source: MDPI journal article supplement (https://www.mdpi.com/2073-4395/12/10/2380)
Supplement: s1 [file s1]

## Supplementary Material

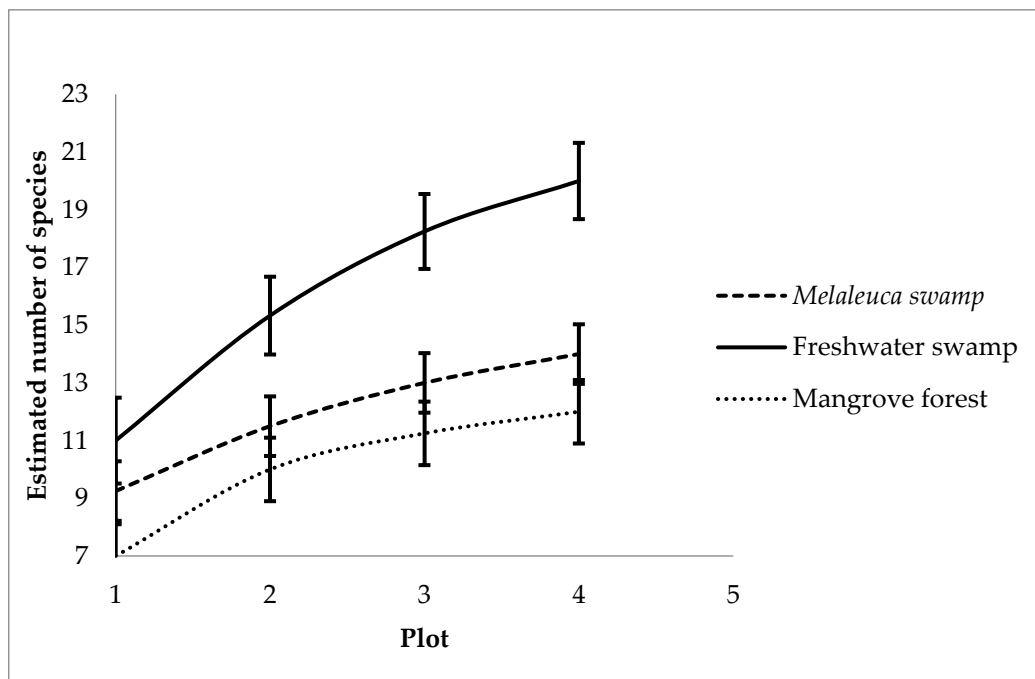

**Figure S1.** Sample-based rarefaction curve for *Melaleuca* swamp forest, freshwater swamp forest and mangrove forest in Setiu Wetlands.

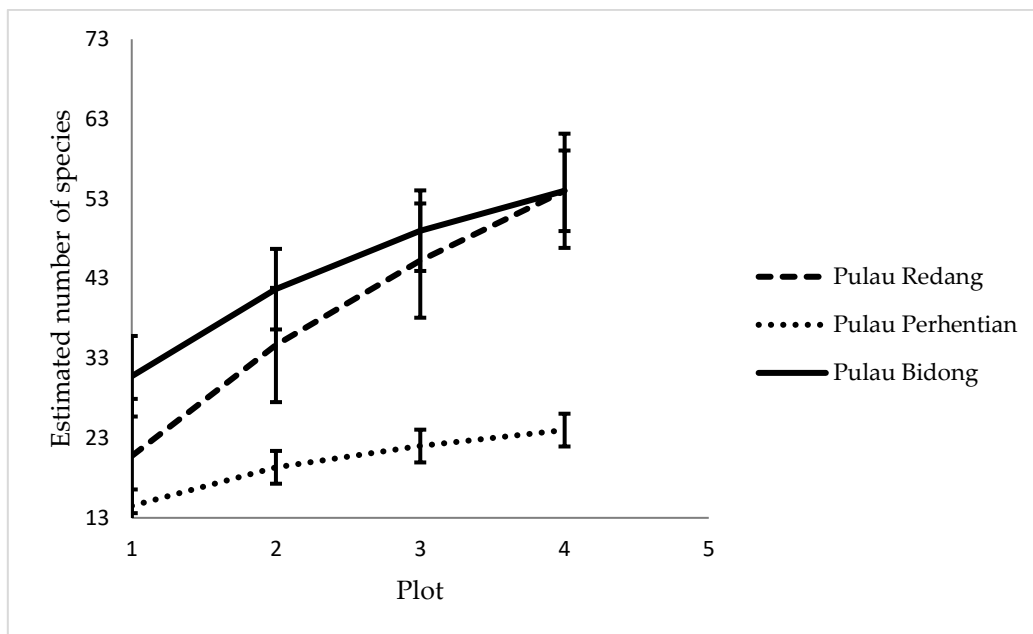

**Figure S2.** Sample-based rarefaction curve for Pulau Redang, Pulau Perhentian and Pulau Bidong.

**Table S1.** Stem density, basal area and diversity in mangrove forest for this study compared with other studies in Southeast Asia.

|                                             | This study | Mukhtar et al.<br>[31]               | Norhayati et<br>al. [32]           | Kasawani et<br>al. [33] | Sudtongkong<br>and Webb [36] | Abino et al.<br>[35] | Wan Norilani<br>et al. [34] |
|---------------------------------------------|------------|--------------------------------------|------------------------------------|-------------------------|------------------------------|----------------------|-----------------------------|
| Stem density<br>(Trees/ha)                  | 1208       | 3711.1<br>4552.8<br>2336.2<br>1022.2 | -                                  | 2070                    | 1373<br>3095<br>4868<br>5655 | 1133                 | 4868<br>1560                |
| Basal area of<br>trees (m <sup>2</sup> /ha) | 8.84       | 25.23<br>27.84<br>31.82<br>23.9      | -                                  | 21.68                   | 78.3<br>15.4<br>22.1<br>9.8  | -                    | 7.77<br>18.18               |
| Diversity (H')                              | 0.98       | -                                    | 1.71<br>1.43<br>0.82<br>1.2<br>1.2 | 1.603                   | 1.99<br>1.9<br>1.11<br>1.4   | 1.63                 | 0.763<br>1.219              |
